# Supplementary material for: Transient antibody-antigen interactions mediate the strain-specific recognition of a conserved malaria epitope
Source: PubMed Central journal article supplement (PMC6123721; doi:10.1038/s42003-018-0063-1), 2018-05-31
Supplement: 42003_2018_63_MOESM1_ESM.pdf [file 42003_2018_63_MOESM1_ESM.pdf]

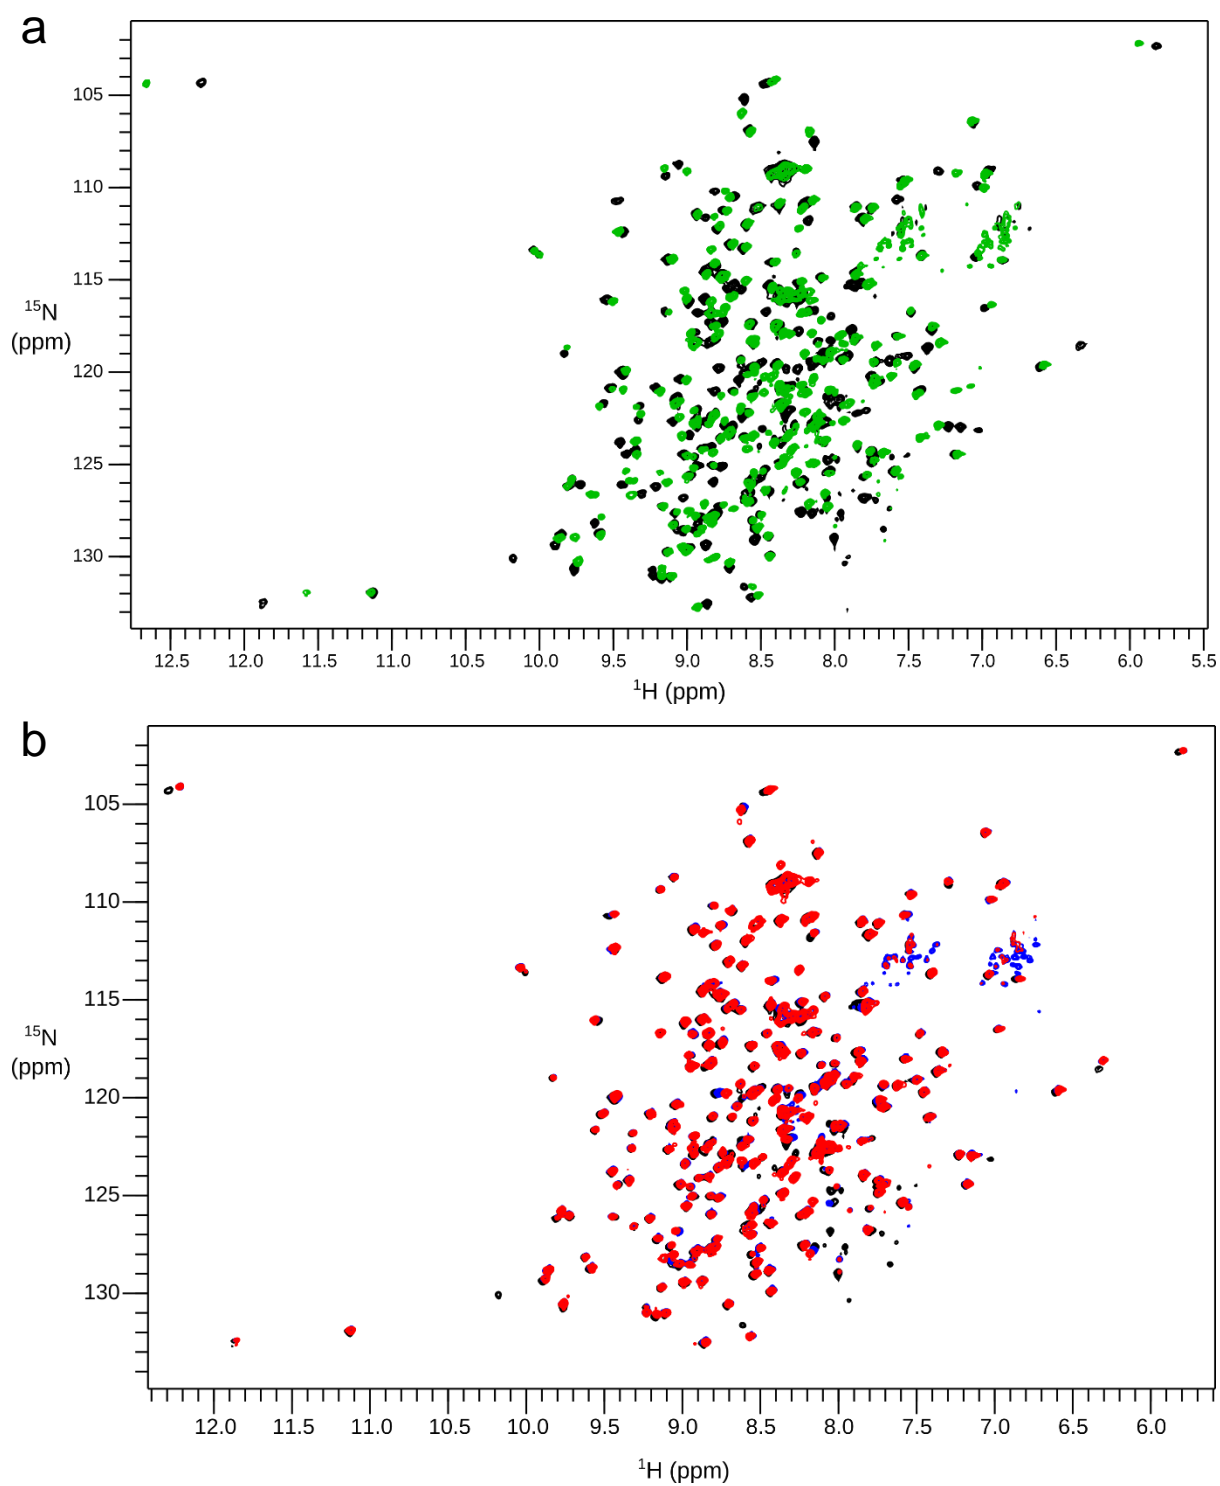

**Supplementary Figure 1.** [ $^{15}\text{N}$ - $^1\text{H}$ ]-TROSY spectra of triple-labelled 6D8 scFv (a) in the absence (green) and presence (black) of MSP<sub>214-22</sub> and (b) in the presence of MSP<sub>214-22</sub> (black), 3D7 MSP<sub>214-34</sub> (red) and FC27 MSP<sub>214-34</sub> (blue).

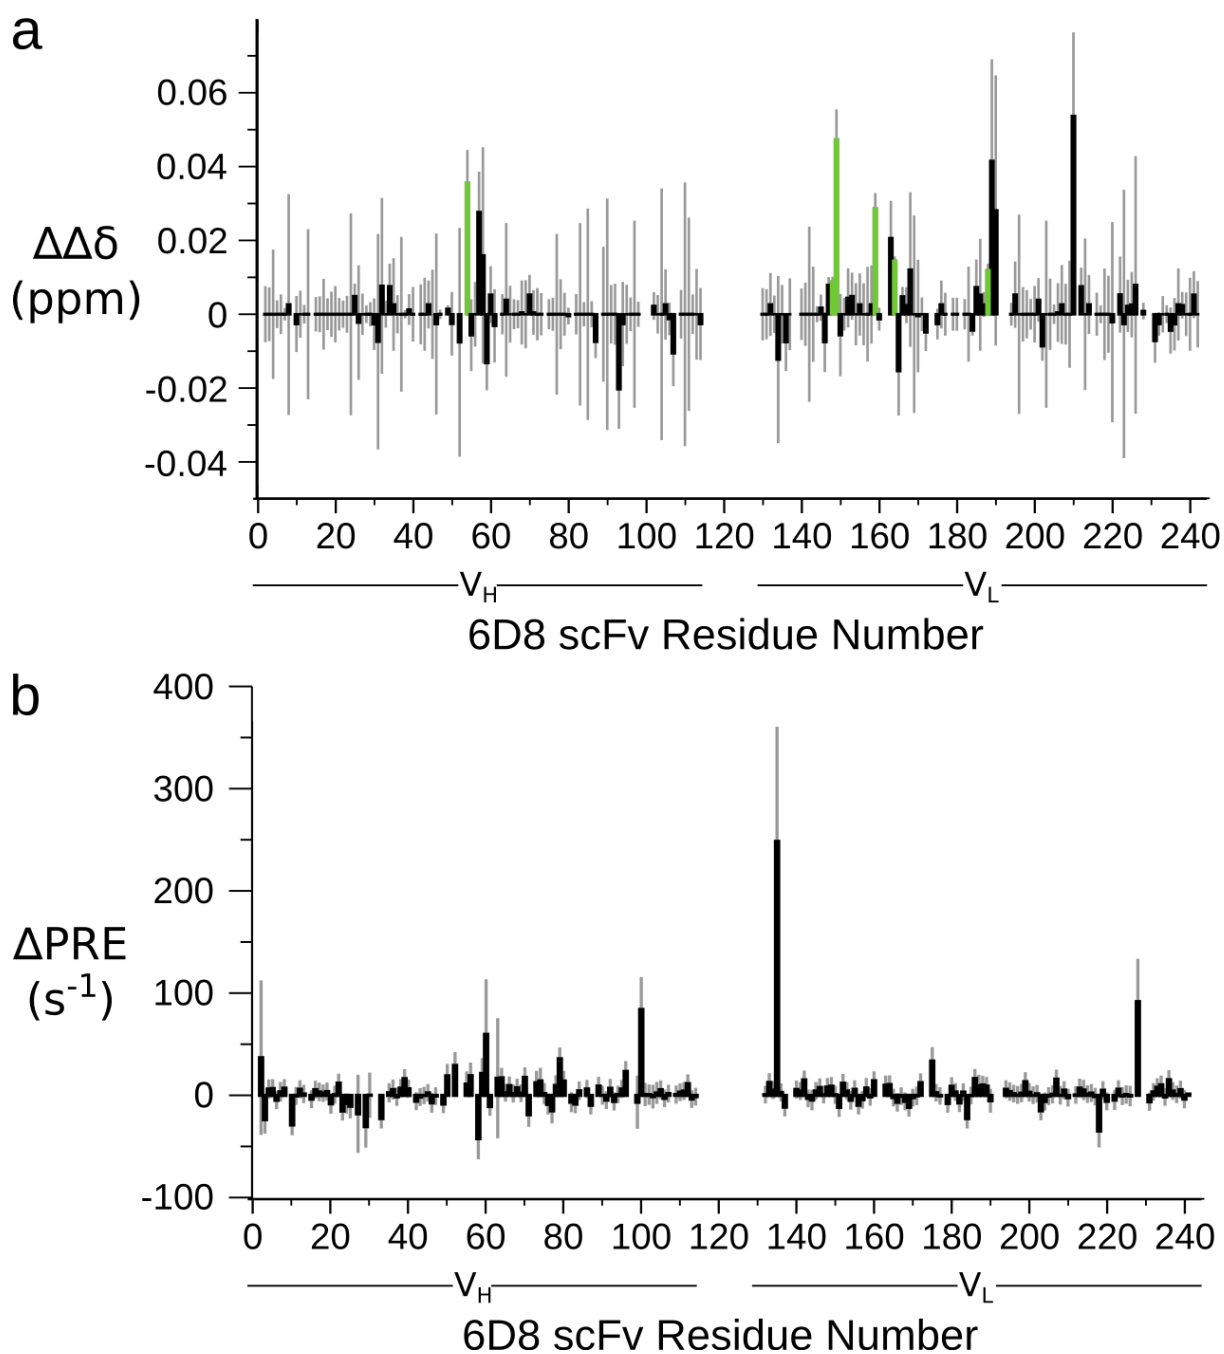

**Supplementary Figure 2.** Chemical shift perturbations and PREs reporting on the fuzzy interactions between  $\text{MSP2}_{14-34}$  and 6D8 scFv are similar between 3D7 MSP2 and FC27 MSP2. (a) Differences between the chemical shift perturbations ( $\Delta\Delta\delta$ ) on 6D8 scFv when binding 3D7  $\text{MSP2}_{14-34}$  versus FC27  $\text{MSP2}_{14-34}$  are plotted, with error bars estimated from repeat  $[\text{}^{15}\text{N}\text{-}^1\text{H}]$ -TROSY spectra recorded from a single sample. Statistically significant differences after Bonferroni correction are highlighted in green. (b) Differences in the PRE on 6D8 scFv bound to C-terminally MTSL-labelled 3D7  $\text{MSP2}_{14-34}$  versus FC27  $\text{MSP2}_{14-34}$  are plotted with error bars estimated on the basis of noise levels in the PRE experiments.

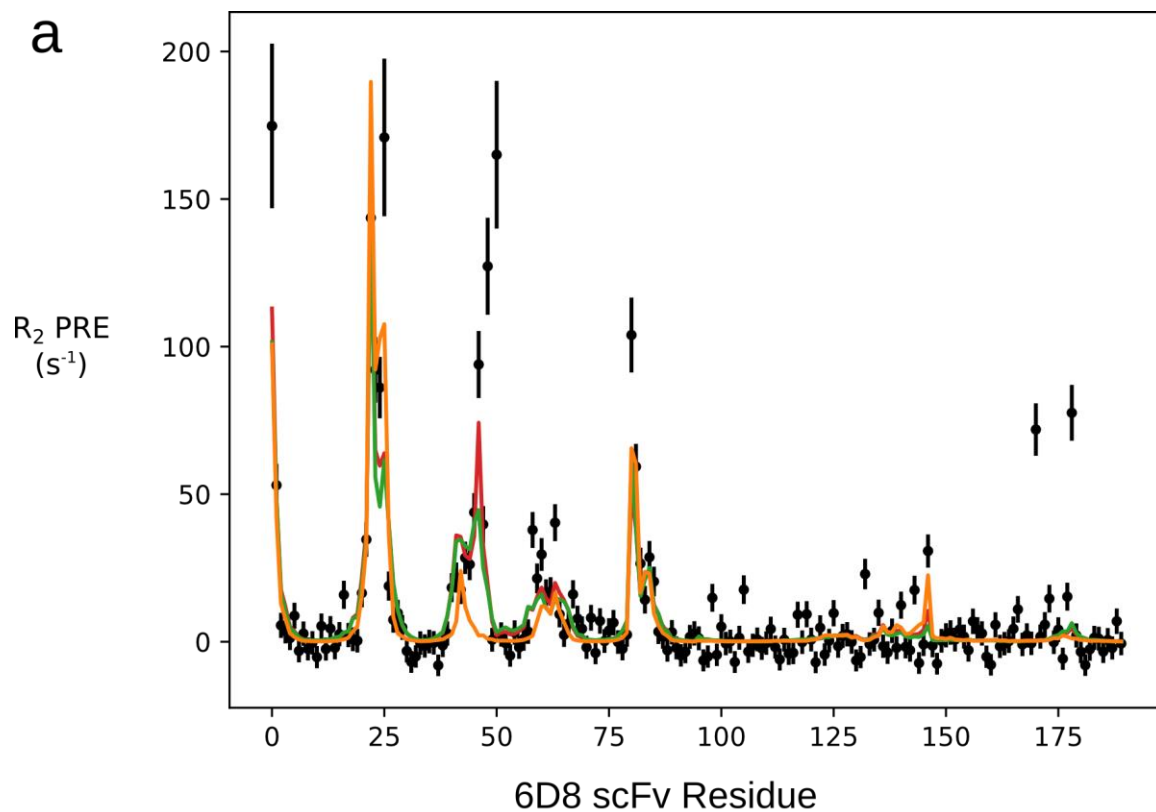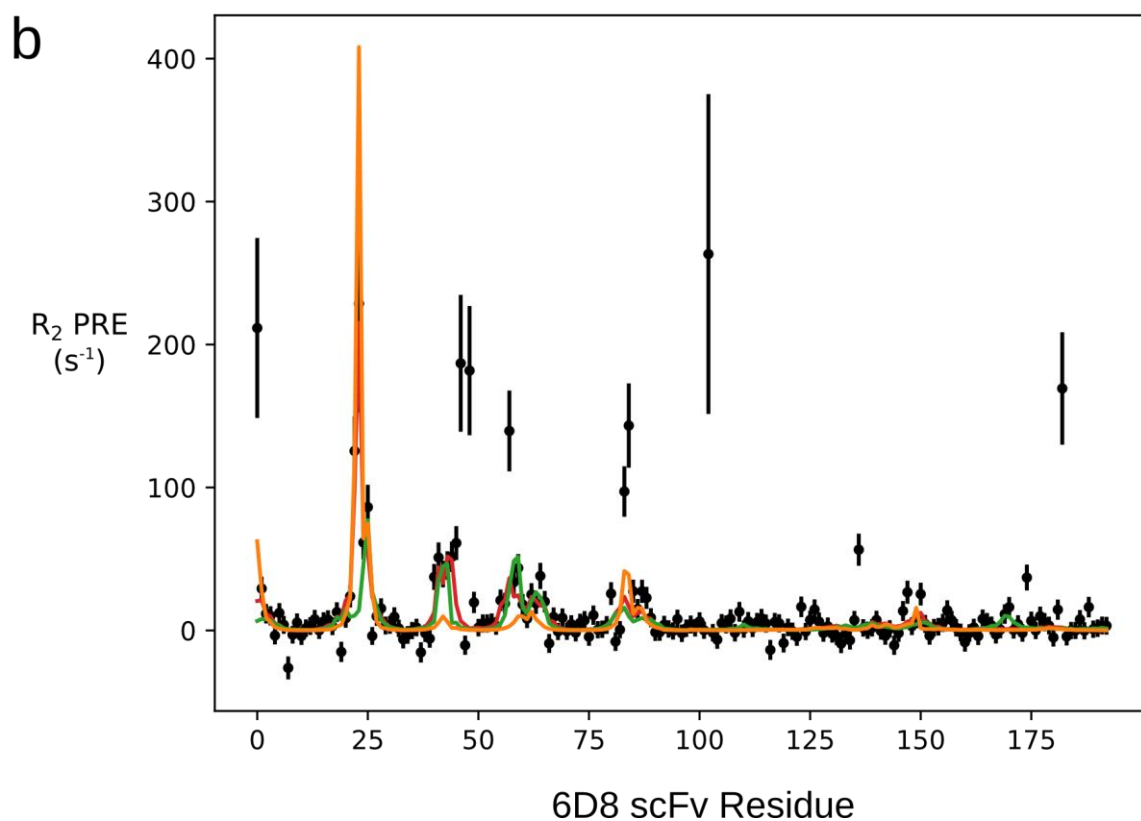

**Supplementary Figure 3.** PREs (black) measured on 6D8 scFv bound to 3D7 MSP2<sub>14-34</sub>-MTSL (a) or FC27 MSP2<sub>14-34</sub>-MTSL (b) and modelled on the basis of one (yellow), two (green), or three (red) discrete equipopulated nitroxide probe locations, as described in the main text.

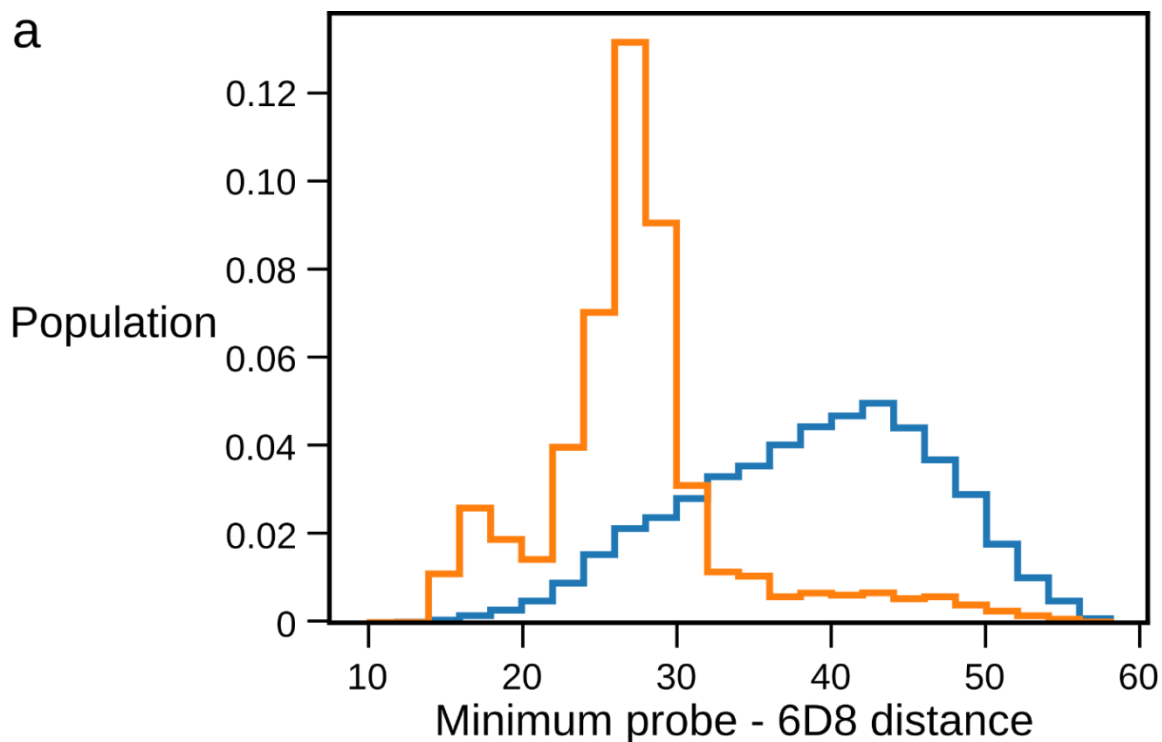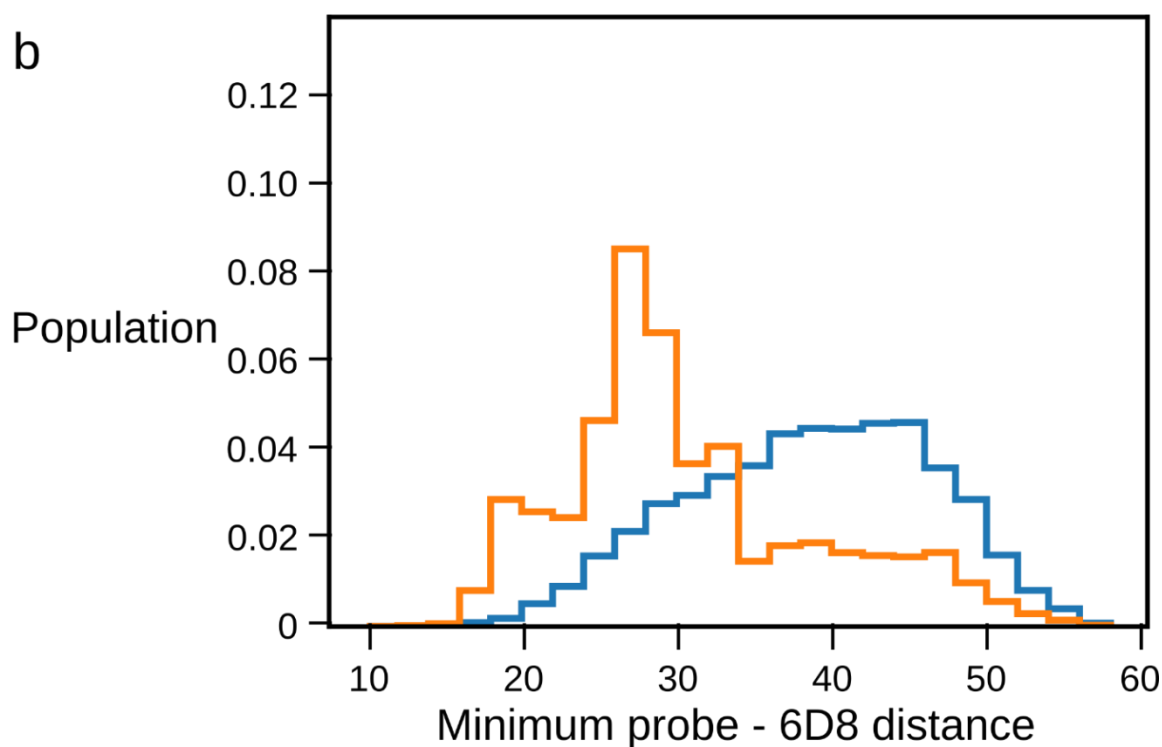

**Supplementary Figure 4.** Reweighting of the Flexible-Meccano ensembles of MSP2<sub>14-34</sub> conformations to fit the experimental PREs favours probe locations closer to 6D8. The distribution of distances from each probe to the nearest 6D8 scFv amide is plotted for the unweighted (blue) and weighted (orange) ensembles for 3D7 (a) and FC27 (b) MSP2<sub>14-34</sub>. The difference in the extent of rewieghting can be attributed to differences in the precision of the two PRE datasets.

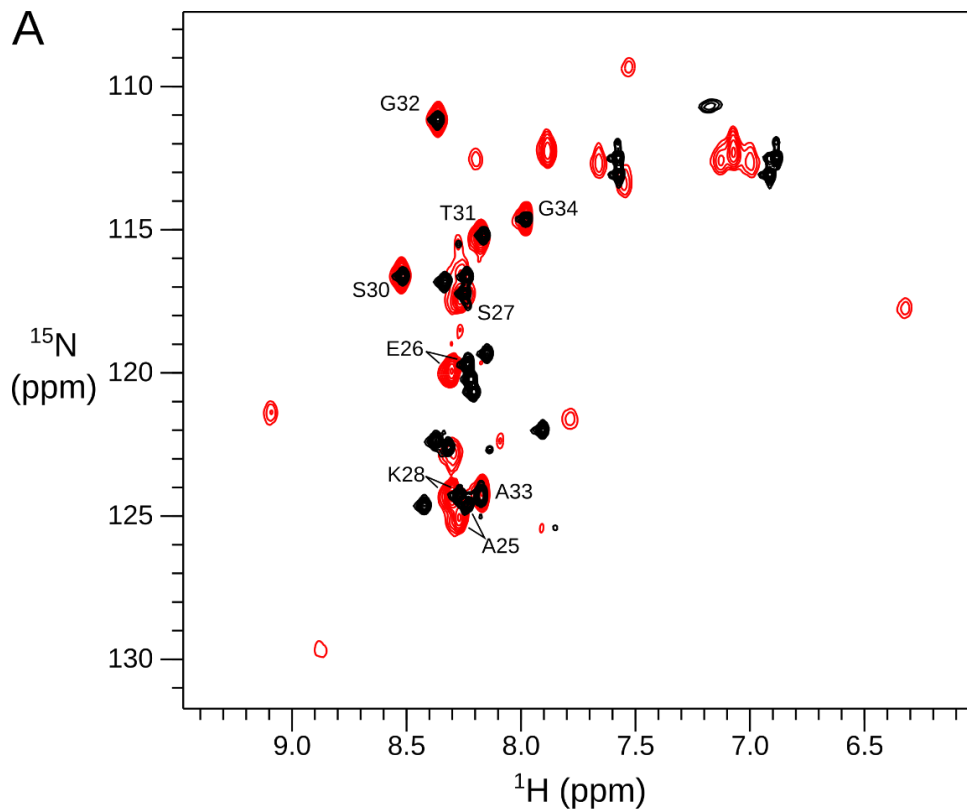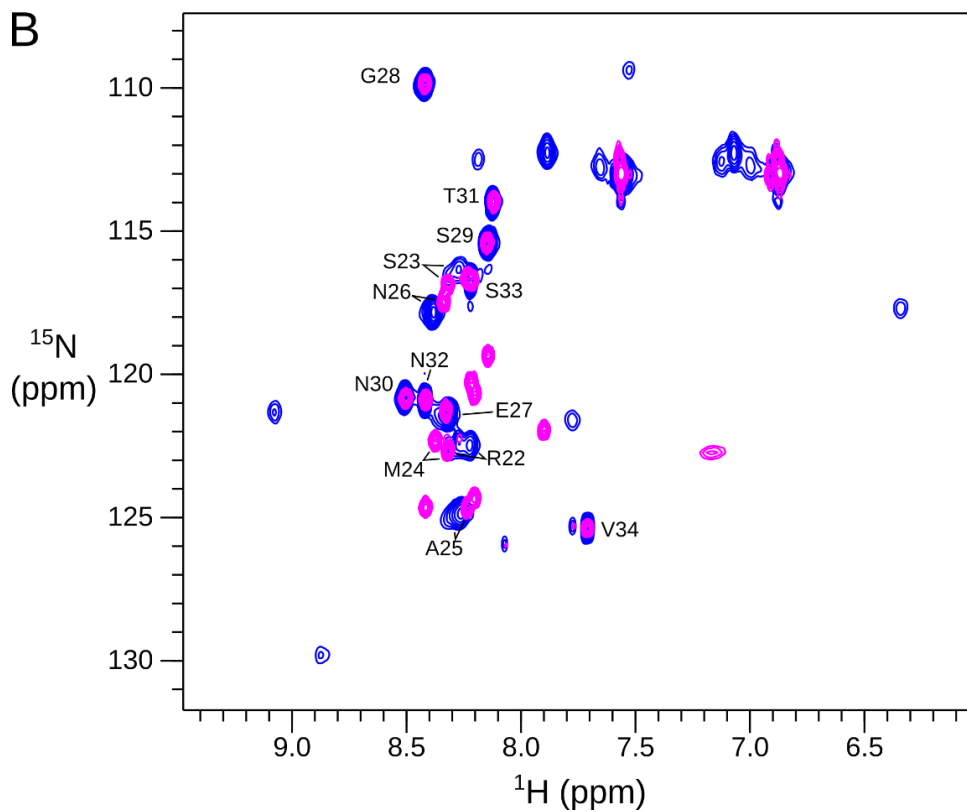

**Supplementary Figure 5.** (A)  $^1\text{H}$ ,  $^{15}\text{N}$  TROSY spectra of 3D7 MSP<sub>214-34</sub> free (black) and bound to 6D8 scFv (red). (B)  $^1\text{H}$ ,  $^{15}\text{N}$  TROSY spectra of FC27 MSP<sub>214-34</sub> free (magenta) and bound to 6D8 scFv (blue). Resonance assignments for the C-terminal half of each peptide are shown.

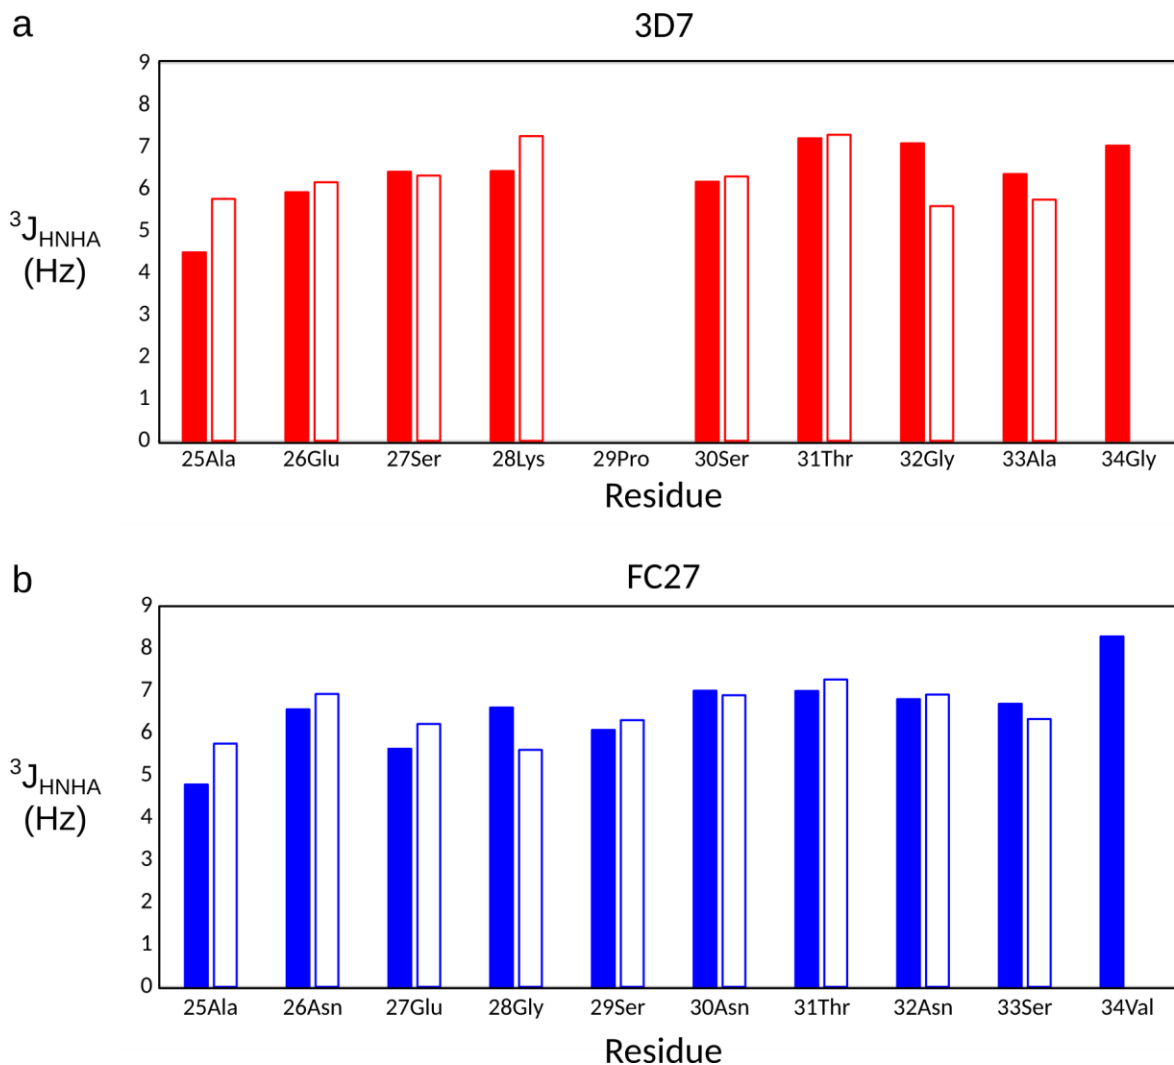

**Supplementary Figure 6.**  $^3J_{\text{HN-HA}}$  scalar couplings of the variable-region residues of 3D7 MSP<sub>214-34</sub> (a) and FC27 MSP<sub>214-34</sub> (b) bound to 6D8 scFv (solid bars) are similar to each other and to  $^3J_{\text{HN-HA}}$  couplings in the free peptide (open bars).

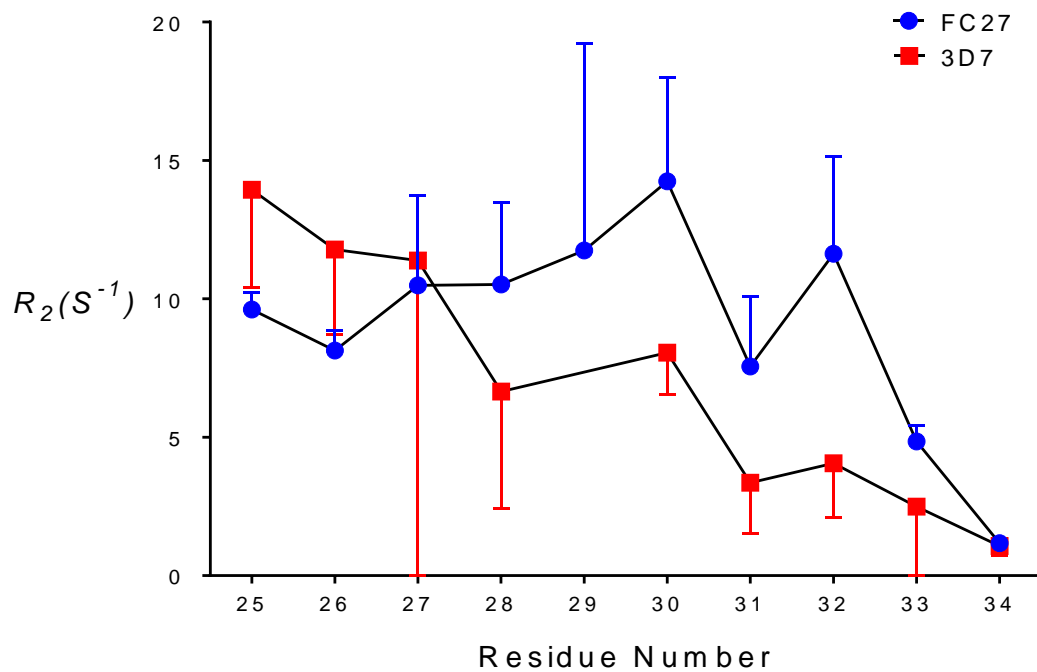

**Supplementary Figure 7.** Transverse relaxation rates ( $R_2$ ) of 3D7 MSP<sub>214-34</sub> (red) are lower than FC27 MSP<sub>214-34</sub> (blue) for most variable-region residues at a  $^1H$  Larmor frequency of 600 MHz.

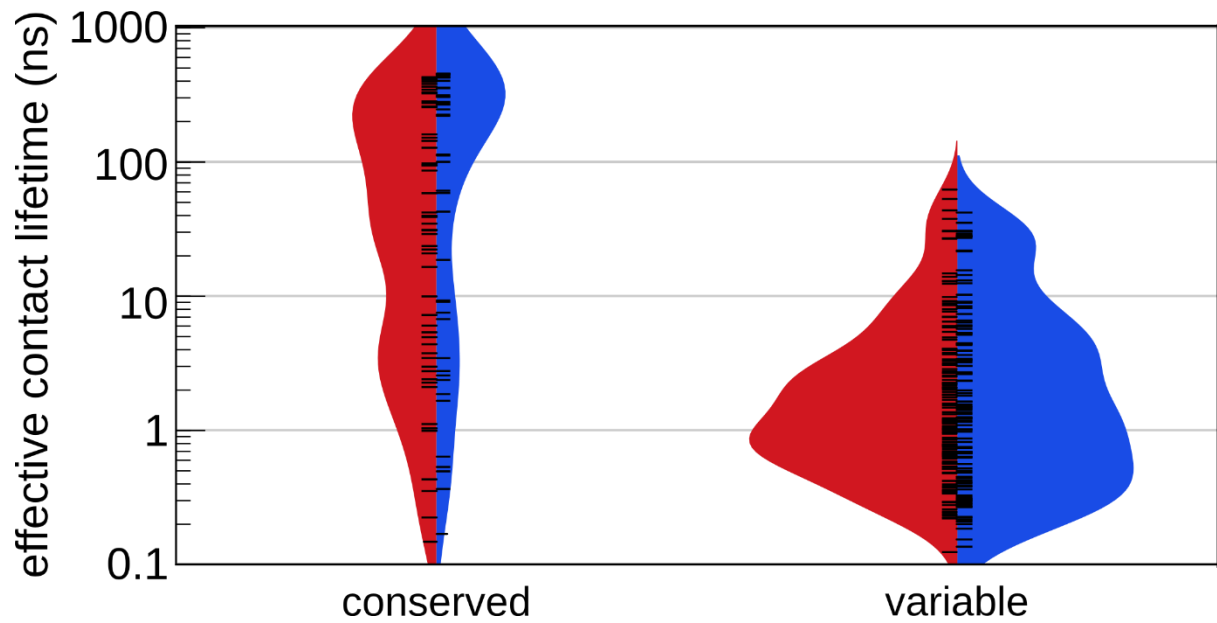

**Supplementary Figure 8.** The effective lifetimes of intermolecular residue contacts are longer for contacts involving the conserved region of the extended epitopes (residues 14-25, left) than for residues in the variable region (residues 26-34, right). Violin plots show the estimated distribution of lifetimes for 3D7 (red) and FC27 (blue). Individual residue contact lifetimes are shown as black ticks.
